# Supplementary material for: Structure and Function of Hoc—A Novel Environment Sensing Device Encoded by T4 and Other Bacteriophages
Source: MDPI journal article supplement (doi:10.3390/v15071517), 2023-07-07
Supplement: s1 [file s1]

**Supplementary Table S1. Isoelectric points (pI) of Hoc proteins**

| <b>Hoc protein</b> | <b>pI value</b> |
|--------------------|-----------------|
| <b>T4 Hoc</b>      | <b>4.74</b>     |
| <b>44rr2Hoc</b>    | <b>4.23</b>     |
| <b>RB49 Hoc</b>    | <b>4.57</b>     |
| <b>RB69 Hoc</b>    | <b>4.72</b>     |
| <b>RB43 Hoc</b>    | <b>5.16</b>     |
| <b>JS98 Hoc</b>    | <b>4.45</b>     |
| <b>Muldoon Hoc</b> | <b>4.70</b>     |
